# Supplementary material
Source: PubMed Central journal article supplement (PMC11029741)
Supplement: 262_2012_1303_MOESM1_ESM.pdf [file 262_2012_1303_MOESM1_ESM.pdf]

## Online Resource Material

### Cancer Immunology, Immunotherapy

Kathrin Bauer et al.

#### Supplementary Table 1

Characteristics of CRC patients

|                                   | Total                  | MSI-Status |            |
|-----------------------------------|------------------------|------------|------------|
|                                   |                        | MSI-H      | MSS        |
| Number of patients                | n=48                   | n=16       | n=32       |
| Tumor-infiltrating T cell samples | n=30                   | n=4        | n=26       |
| Peripheral T cell samples         | n=31                   | n=14       | n=17       |
| Age (years, median;range)         | 60 (30;85)             | 46 (33;77) | 65 (30;85) |
| Gender                            |                        |            |            |
| male                              | 31 (64.6) <sup>a</sup> | 13 (81.3)  | 18 (56.3)  |
| female                            | 17 (35.4)              | 3 (18.8)   | 14 (43.8)  |
| Stage of disease (UICC)           |                        |            |            |
| I                                 | 5 (10.4)               | 4 (25.0)   | 1 (3.1)    |
| II                                | 6 (12.5)               | 2 (12.5)   | 4 (12.5)   |
| III                               | 13 (27.1)              | 2 (12.5)   | 11 (34.4)  |
| IV                                | 10 (20.8)              | 1 (6.3)    | 10 (31.3)  |
| NA                                | 14 (29.2)              | 7 (43.8)   | 6 (18.8)   |

NA not available

<sup>a</sup> Numbers in parentheses indicate percentage values if not otherwise indicated

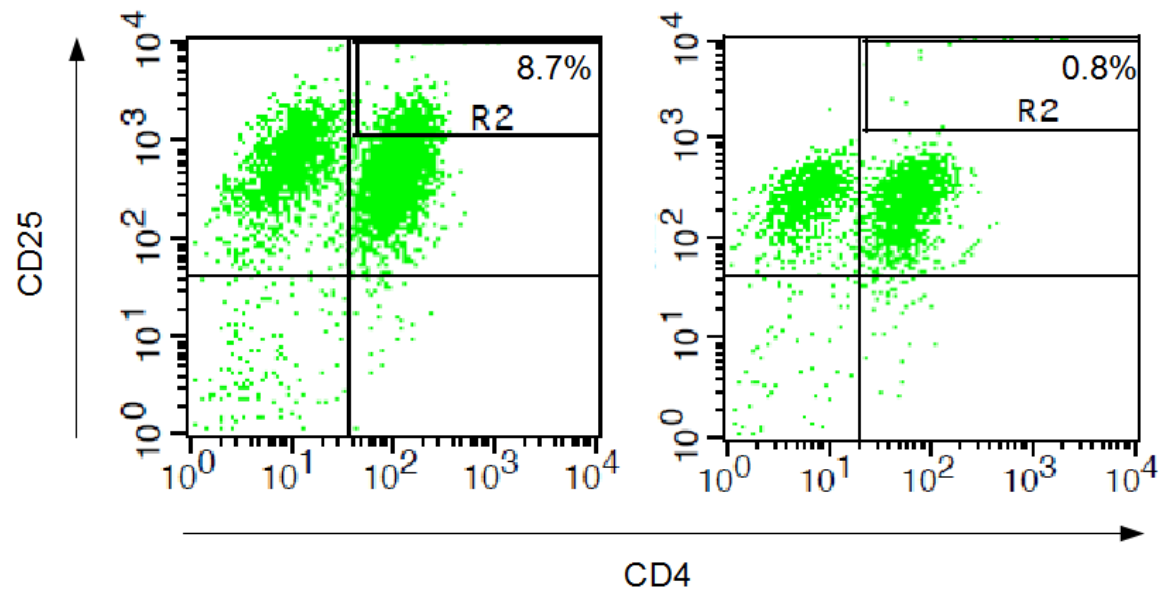

### Supplementary Figure 1

Representative T cell sample prior (left) and upon Treg cell depletion (right). Treg cell depletion resulted in a decrease of CD4-positive CD25-high T cells from 8.7 % to 0.8%

|           |       | MSI-H              |      |      |   |            |      |      |  |      |      |      |  |      |      |  |      |
|-----------|-------|--------------------|------|------|---|------------|------|------|--|------|------|------|--|------|------|--|------|
|           |       | tumor-infiltrating |      |      |   | peripheral |      |      |  |      |      |      |  |      |      |  |      |
| HT001(-1) | +Treg |                    |      |      |   |            |      |      |  |      |      |      |  |      |      |  |      |
|           | -Treg |                    |      |      |   |            |      |      |  |      |      |      |  |      |      |  |      |
|           | mut   | wt/m               | wt/m | wt/m |   | wt/m       | wt/m | wt/m |  | wt   | wt   | m    |  | wt/m | wt   |  | wt/m |
| AIM2(-1)  | +Treg |                    |      |      |   |            |      |      |  |      |      |      |  |      |      |  |      |
|           | -Treg |                    |      |      |   |            |      |      |  |      |      |      |  |      |      |  |      |
|           | mut   | m                  | wt/m | wt   |   | m          | wt/m | m    |  | m    | m    | m    |  | wt/m | m    |  | wt/m |
| TAF1B(-1) | +Treg |                    |      |      |   |            |      |      |  |      |      |      |  |      |      |  |      |
|           | -Treg |                    |      |      |   |            |      |      |  |      |      |      |  |      |      |  |      |
|           | mut   | wt/m               | wt/m | wt/m |   | wt/m       | wt   | wt/m |  | wt   | wt   | wt/m |  | wt/m | wt/m |  | wt/m |
| TGFB2(-1) | +Treg |                    |      |      |   |            |      |      |  |      |      |      |  |      |      |  |      |
|           | -Treg |                    |      |      |   |            |      |      |  |      |      |      |  |      |      |  |      |
|           | mut   | wt/m               | wt/m | wt   |   | wt/m       | wt/m | wt/m |  | wt/m | wt/m | wt/m |  | wt/m | wt   |  | wt/m |
| MUC1(20)  | +Treg |                    |      |      |   |            |      |      |  |      |      |      |  |      |      |  |      |
|           | -Treg |                    |      |      |   |            |      |      |  |      |      |      |  |      |      |  |      |
| MUC1(100) | +Treg |                    |      |      |   |            |      |      |  |      |      |      |  |      |      |  |      |
|           | -Treg |                    |      |      |   |            |      |      |  |      |      |      |  |      |      |  |      |
|           | expr  | 3                  | 3    | 2    | 2 | 3          | 3    | 4    |  | 3-4  | 3    | 4    |  | 3    | 4    |  | 3-4  |
| CEA       | +Treg |                    |      |      |   |            |      |      |  |      |      |      |  |      |      |  |      |
|           | -Treg |                    |      |      |   |            |      |      |  |      |      |      |  |      |      |  |      |
|           | expr  | 4                  | 3-4  | 3    | 3 | 4          | 2    | 4    |  | 2    | 3    | 3    |  | 3    | 3    |  | 4    |

## Supplementary Figure 2

Response pattern of tumor-infiltrating and peripheral T cell samples from MSI-H CRC patients without (light grey) and with (dark grey) Treg-cell depletion, FSP mutation status (wt = wildtype allele, wt/m = heterozygous mutated, m = mutations in both alleles) and expression level of hypoglycosylated MUC1 and CEA (2 = 20-50% of tumor cells express the antigen; 3 = 50-80% of tumor cells express the antigen; 4 = 80-100% of tumor cells express the antigen). Crossed boxes = data have not been obtained

**a**

**Score 1:**

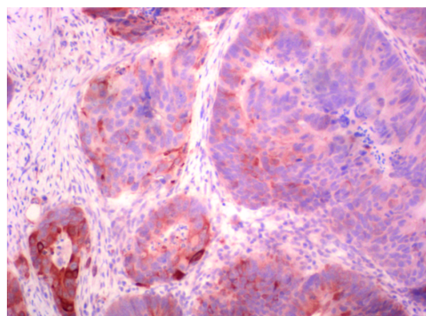

100 μm

**Score 2:**

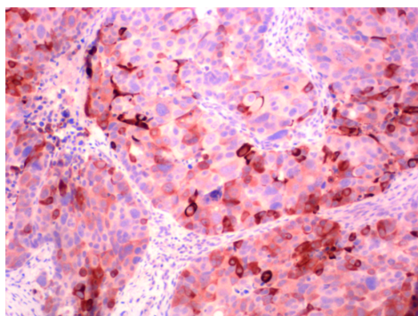

100 μm

**Score 3:**

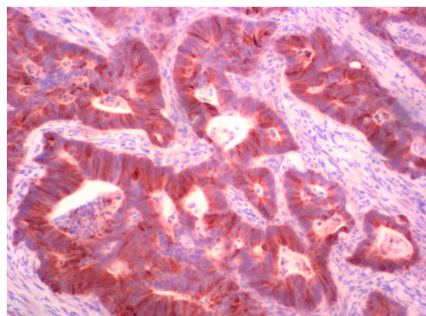

100 μm

**Score 4:**

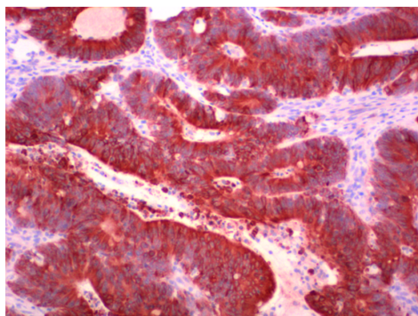

100 μm

**b**

**Score 1:**

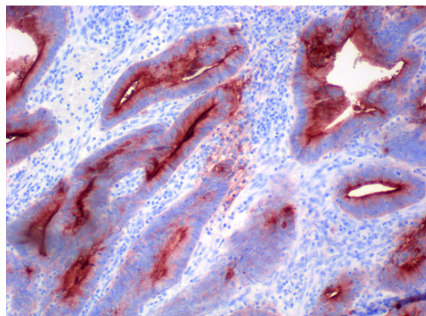

100 μm

**Score 2:**

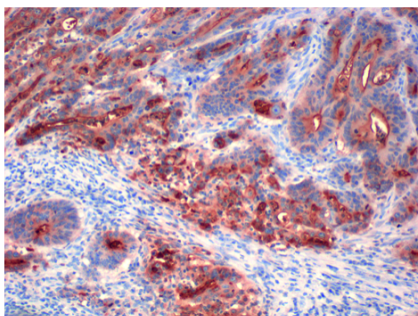

100 μm

**Score 3:**

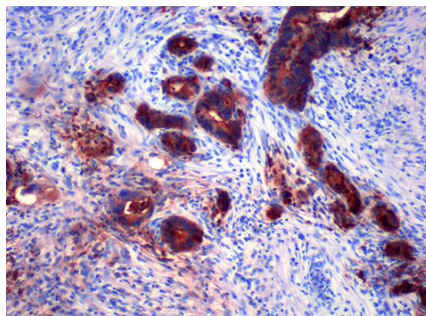

100 μm

**Score 4:**

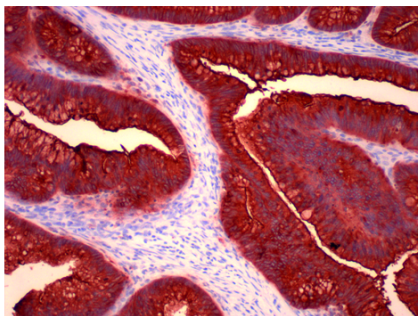

100 μm

### **Supplementary Figure 3**

Representative immunohistochemical stainings illustrating the scoring for hypoglycosylated MUC1 (a) and CEA (b) expression. Score 1: antigens are expressed in up to 20% of the tumor cells; score 2: expression is detected in 20-50% of the tumor cells; score 3: antigen expression in 50-80% of the tumor cells; score 4: 80-100% of the tumor cells express the respective antigen. Pictures were taken with a Leica DMRBE microscope and a digital camera DFC480 (Leica Microsystems, Solms, Germany)



of tumor cells express the antigen; 3 = 50-80% of tumor cells express the antigen; 4 = 80-100% of tumor cells express the antigen). Crossed boxes = data have not been obtained
